# Supplementary material
Source: Springer Nature journal article supplement (https://www.springermedizin.de/resource/supplementary/12990_2010_298_MOESM3_ESM.pdf/9612978)

# Average # of Spikes during Long Pulse (15s) Laser Stimulation

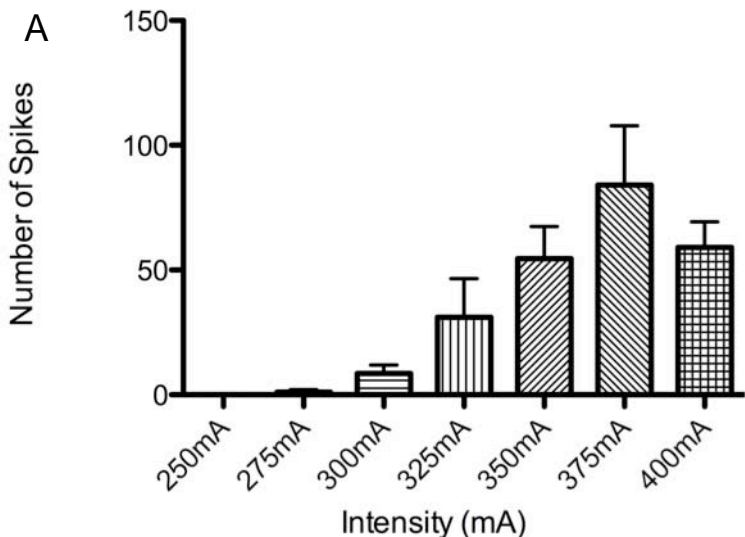

# Average # of Spikes during Short Pulse (200ms) Laser Stimulation

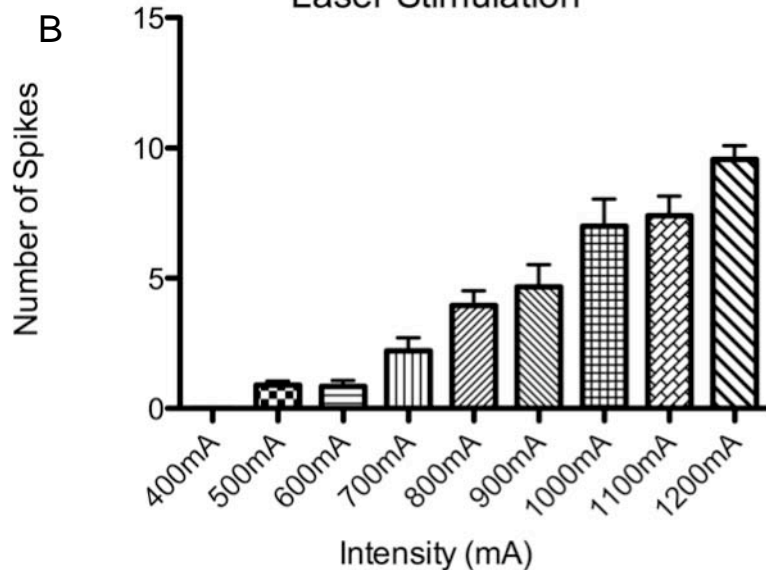

Supplement: MOESM3 [file 9612978]
